# Supplementary material
Source: PubMed Central journal article supplement (PMC4093987)
Supplement: jn.114.194407_nutrition194407SupplementaryData1.pdf [file jn.114.194407_nutrition194407SupplementaryData1.pdf]

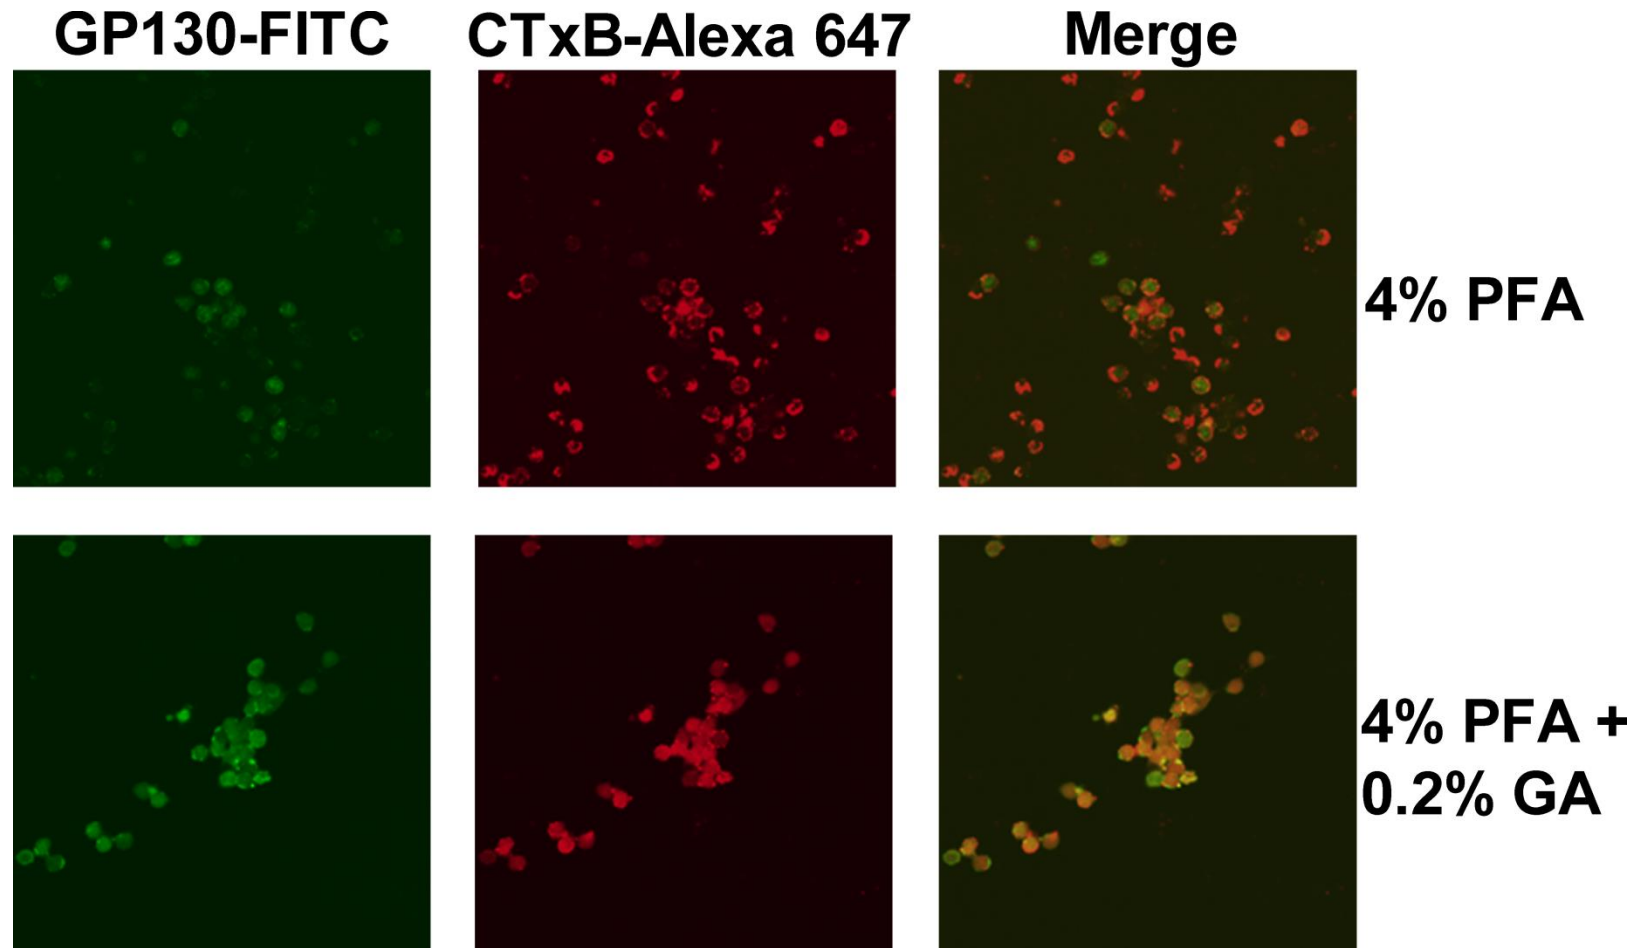

**Supplemental Figure 1. Optimization of cell fixation for immunofluorescence.** Representative images from freshly isolated CD4<sup>+</sup> T cells were fixed with 4% PFA with or without 0.2% GA. The reaction was quenched with 100 mM glycine before cells were permeabilized with Triton and labeled with anti-GP130 and CTxB. Imaging was conducted in confocal mode with a 63X Plan Achromat objective, n=2.
