# Supplementary material
Source: PubMed Central journal article supplement (PMC4093987)
Supplement: jn.114.194407_nutrition194407SupplementaryData2.pdf [file jn.114.194407_nutrition194407SupplementaryData2.pdf]

## Online Supporting Material

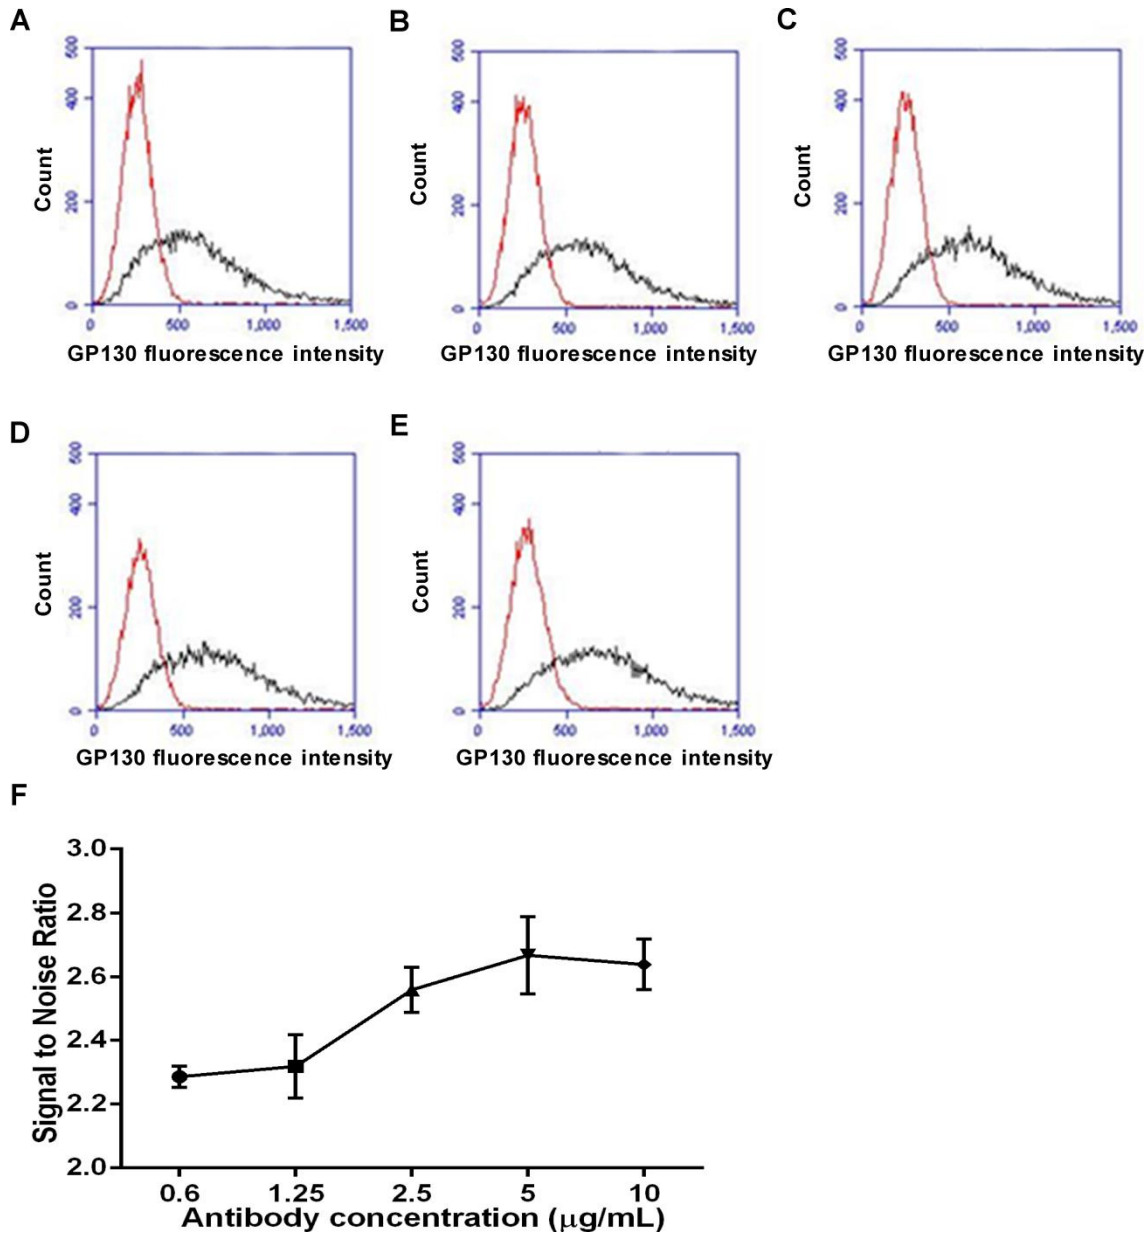

**Supplemental Figure 2. Optimization of GP130 antibody level.** Splenic CD4<sup>+</sup> T cells were incubated with 0.6, 1.25, 2.5, 5 or 10  $\mu\text{g/mL}$  anti-GP130 or anti-rat IgG (n=2-3 per treatment) for 30 minutes for analysis by flow cytometry. The signal to noise ratio was determined by dividing the fluorescence intensity in the anti-GP130 labeled cells by the fluorescence intensity in the isotype control with the same level of antibody. Histogram of fluorescence intensity of cells labeled with anti-GP130 (black) or the isotype control (red) at A) 0.6  $\mu\text{g/mL}$ , B) 1.25  $\mu\text{g/mL}$ , C) 2.5  $\mu\text{g/mL}$ , D) 5  $\mu\text{g/mL}$  and E) 10  $\mu\text{g/mL}$ . F) Signal to noise ratio at each antibody concentration, data represent means  $\pm$  SEM, n=2-3.
