# Supplementary material
Source: PubMed Central journal article supplement (PMC4093987)
Supplement: jn.114.194407_nutrition194407SupplementaryData3.pdf [file jn.114.194407_nutrition194407SupplementaryData3.pdf]

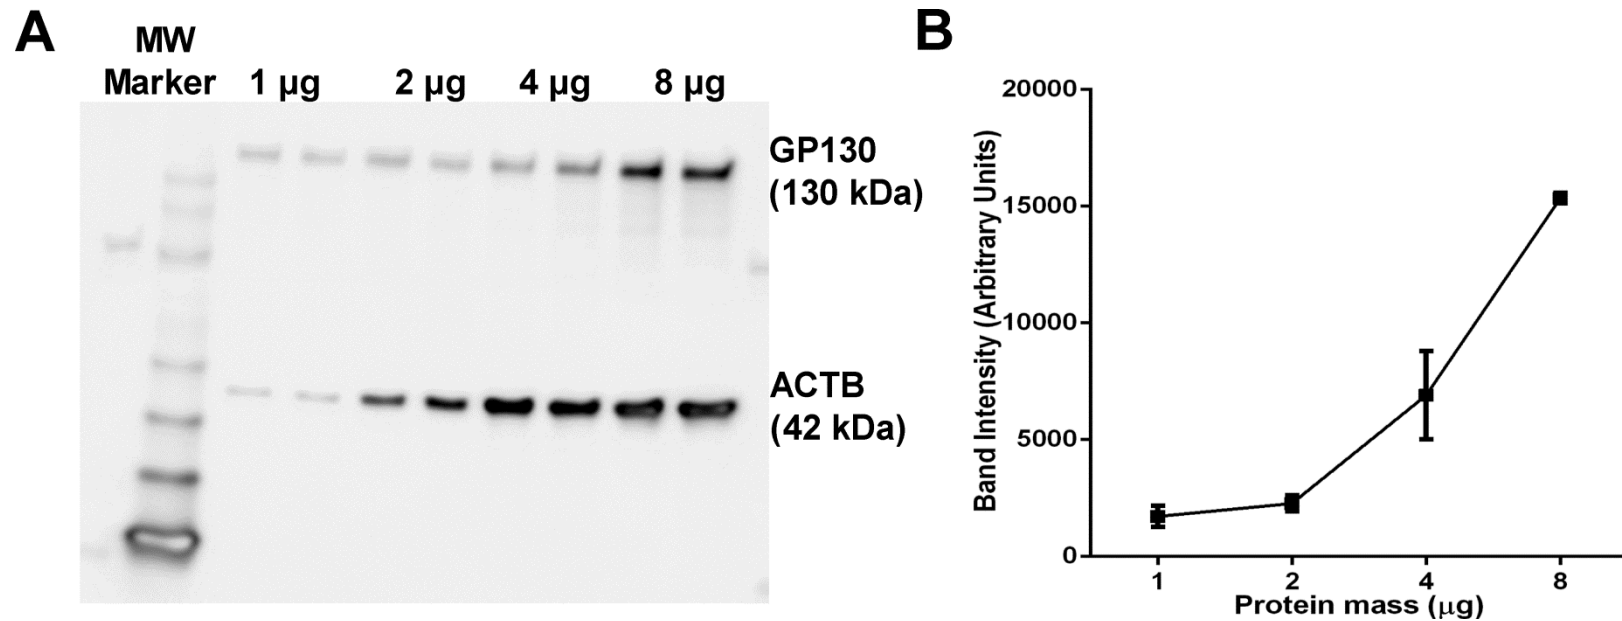

**Supplemental Figure 3. Optimization of protein loading for Western Blot.** CD4<sup>+</sup> T cells were homogenized and protein was quantified using the Coomassie Plus Protein Assay. Varying amounts of protein (1, 2, 4 and 8  $\mu$ g) were loaded onto a 12% polyacrylamide gel and electrophoresed for 2 hours before transfer to a PVDF membrane for 1.5 hours. GP130 and beta actin were detected using antibodies from Santa Cruz and Abcam and detected by chemiluminescence. A) Representative image of a gel, B) fluorescence intensity by protein mass. Data represent means  $\pm$  SEM, n=2.
