# Supplementary material
Source: PubMed Central journal article supplement (PMC4093987)
Supplement: jn.114.194407_nutrition194407SupplementaryData4.pdf [file jn.114.194407_nutrition194407SupplementaryData4.pdf]

Online Supporting Material

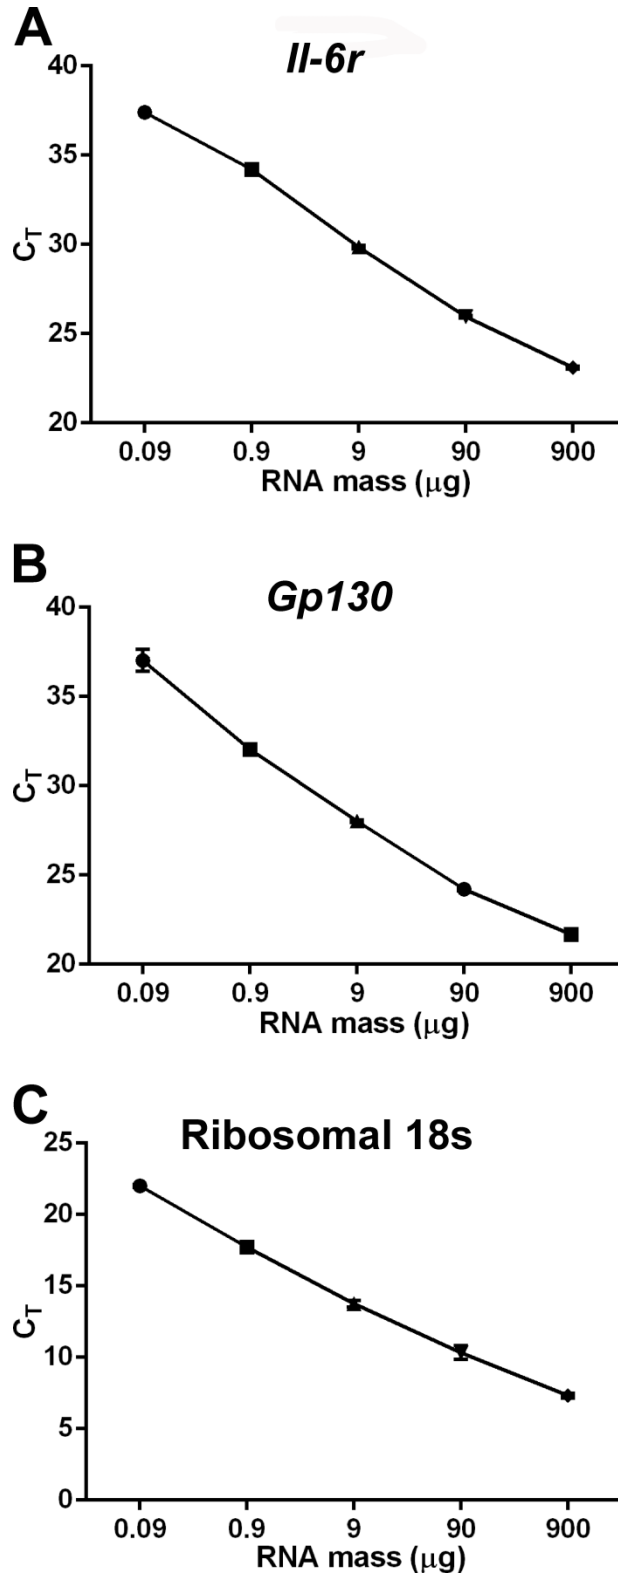

**Supplemental Figure 4. PCR threshold cycle in relation to RNA mass.** Differing levels of RNA were reverse transcribed and gene expression of A) *Il-6r* B) *Gp130* and C) ribosomal 18S were analyzed by qPCR. Data represent mean  $\pm$  SEM, n=4.
