# Supplementary material
Source: PubMed Central journal article supplement (PMC4093987)
Supplement: jn.114.194407_nutrition194407SupplementaryData5.pdf [file jn.114.194407_nutrition194407SupplementaryData5.pdf]

Online Supporting Material

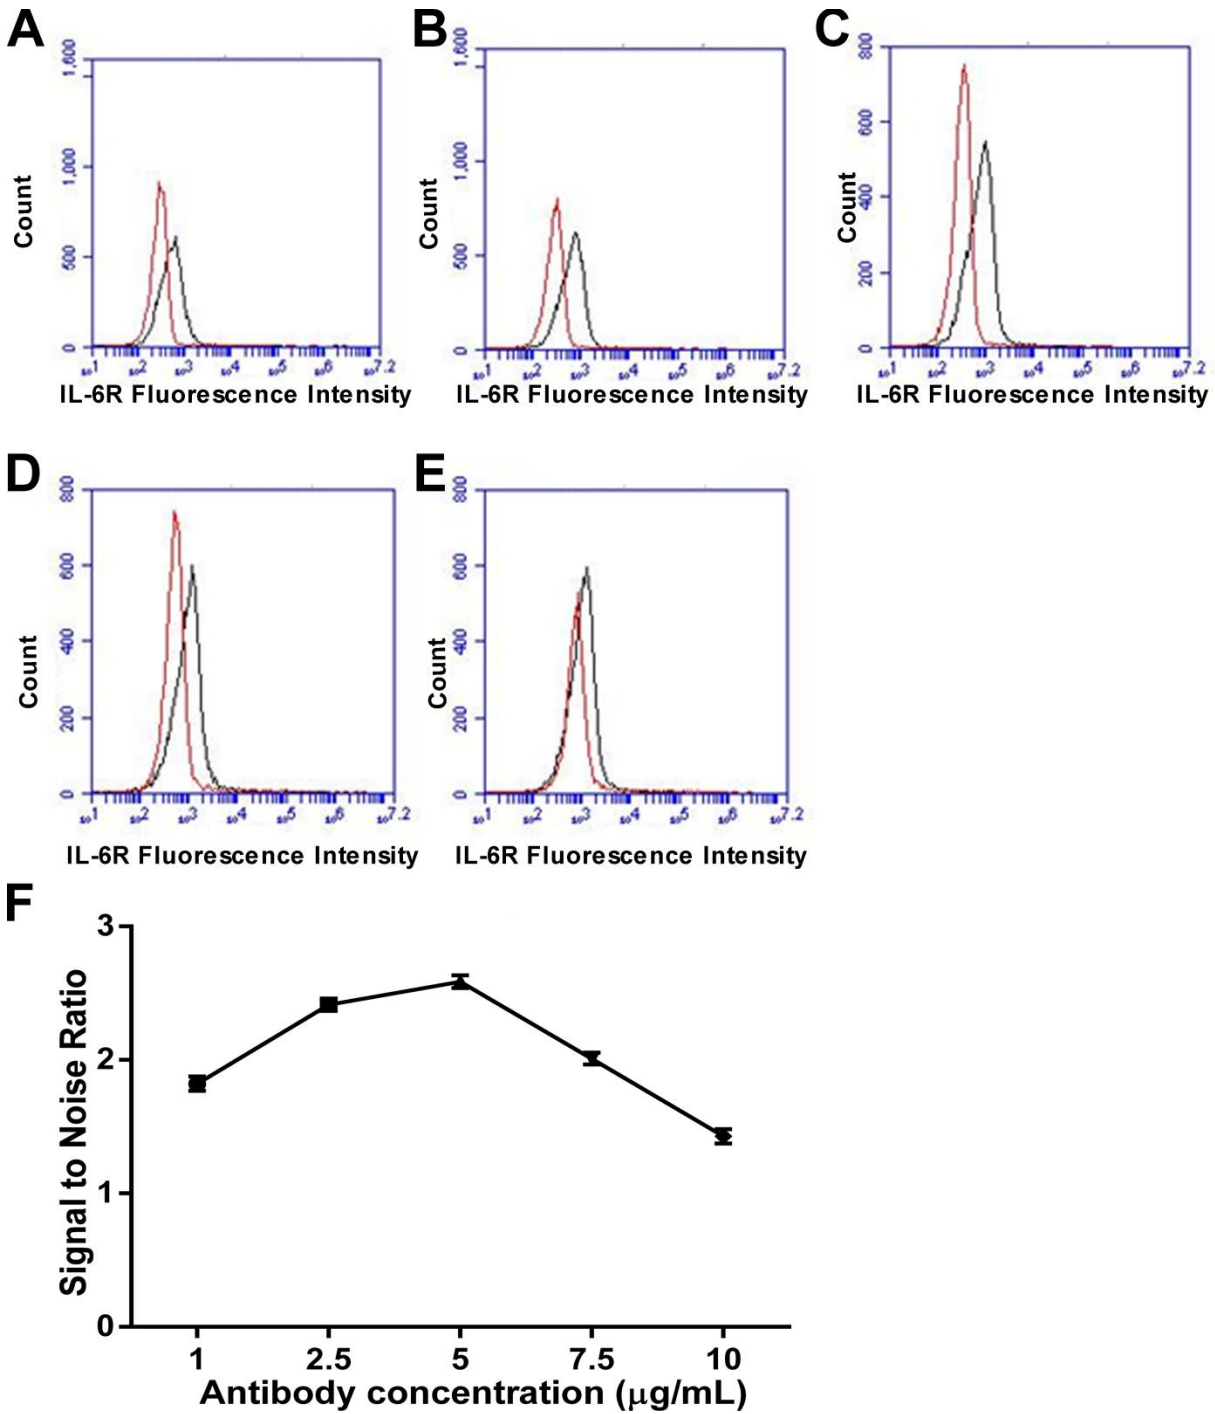

**Supplemental Figure 5. Optimization of anti-IL-6R level.** Splenic WT CD4<sup>+</sup> T cells were incubated with anti-IL-6R (black) or the isotype control (red) A) 1 μg/mL B) 2.5 μg/mL C) 5 μg/mL D) 7.5 μg/mL or E) 10 μg/mL for 30 minutes before analysis by flow cytometry, n=3. F) Signal to noise ratio by antibody concentration from one experiment, n=3 per treatment. Data represent mean ± SEM, n=3.
