# Supplementary material
Source: PubMed Central journal article supplement (PMC4093987)
Supplement: jn.114.194407_nutrition194407SupplementaryData6.pdf [file jn.114.194407_nutrition194407SupplementaryData6.pdf]

Online Supporting Material

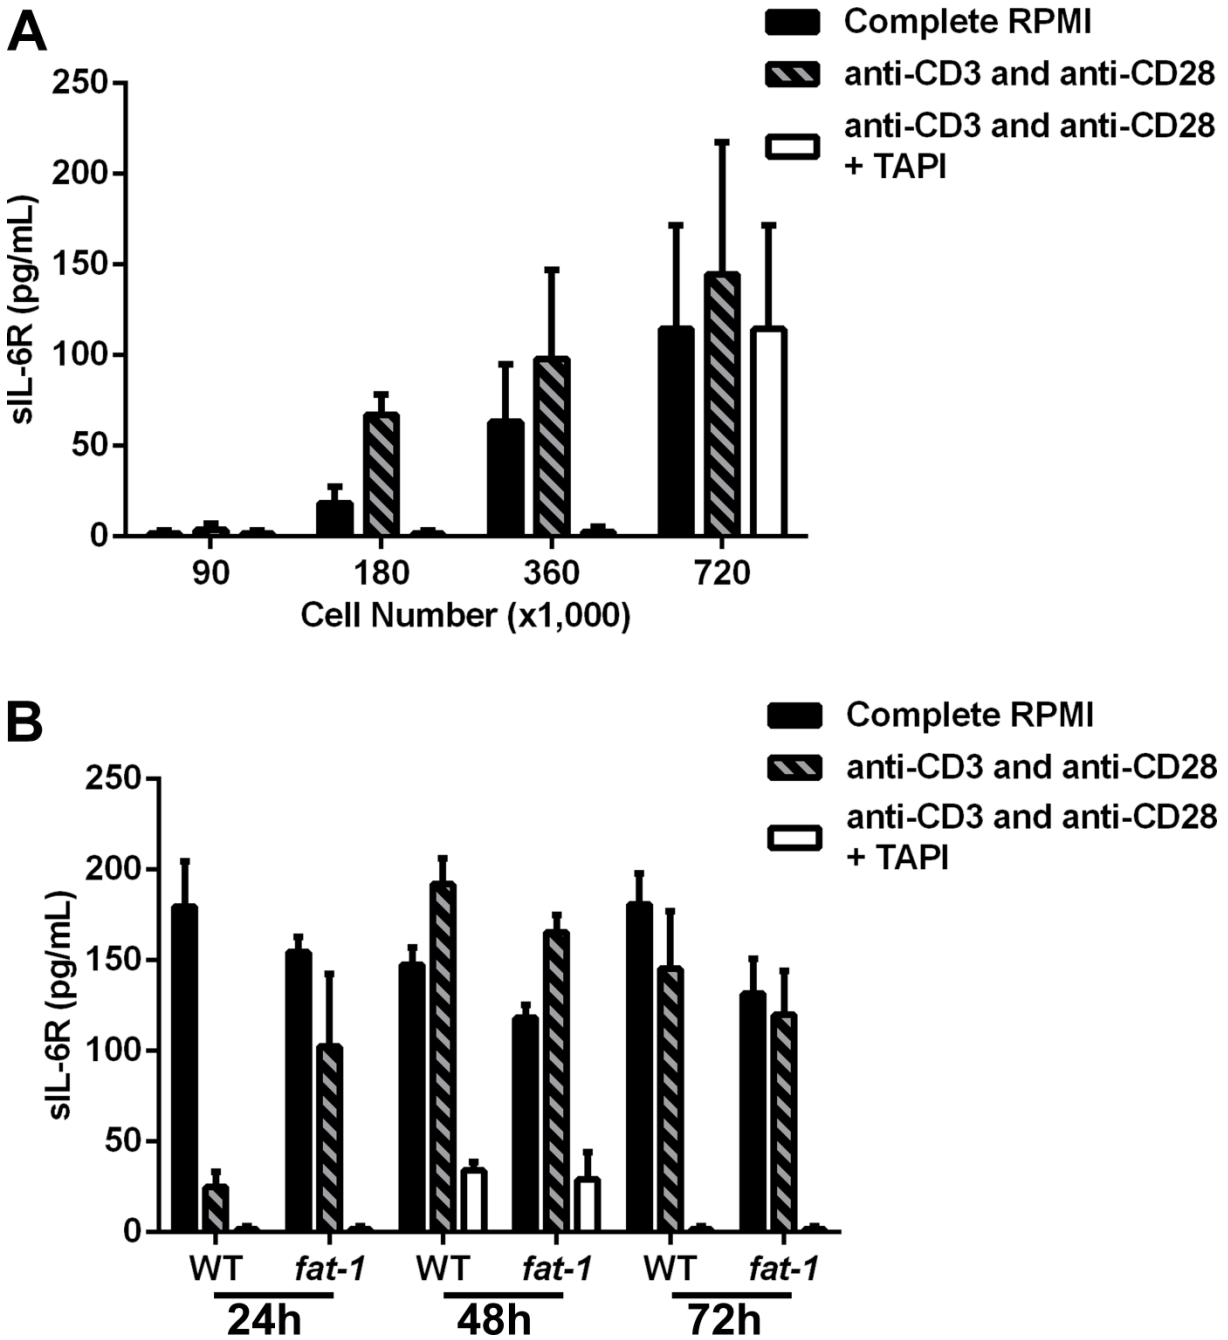

**Supplemental Figure 6. Optimization of CD4<sup>+</sup> T cell activation and measurement of sIL-6R.** CD4<sup>+</sup> T cells were stimulated with anti-CD3 and anti-CD28 for 24, 48 and 72 hours before supernatants were collected and analyzed by ELISA. A) Comparison of varying amounts of WT CD4<sup>+</sup> T cells were incubated for 48 hours, data represent means  $\pm$  SEM, n=3 per condition. B) A cell population of  $4 \times 10^6$  CD4<sup>+</sup> T cells from WT and *fat-1* mice were stimulated over 24, 48 and 72 hours. Data represent means  $\pm$  SEM, n=4 per condition.
